# Supplementary material for: Increased Vaccination Diversity Leads to Higher and Less-Variable Neutralization of TBE Viruses of the European Subtype
Source: Vaccines (Basel). 2023 May 31;11(6):1044. doi: 10.3390/vaccines11061044 (PMC10304915; doi:10.3390/vaccines11061044)
Supplement: Supplementary file 1 [file vaccines-11-01044-s001.zip › vaccines-2412326-supplementary.pdf]

## Supplementary:

**Table S1.** Summary of Vaccination status.

| Vaccination status | count |  | mean | median | sd   | Se    |
|--------------------|-------|--|------|--------|------|-------|
| Encepur            | 192   |  | 2.8  | 3      | 1.43 | 0.103 |
| FSME-IM-MUN        | 176   |  | 3.80 | 4      | 1.62 | 0.122 |
| MIX                | 160   |  | 5.35 | 6      | 1.74 | 0.137 |

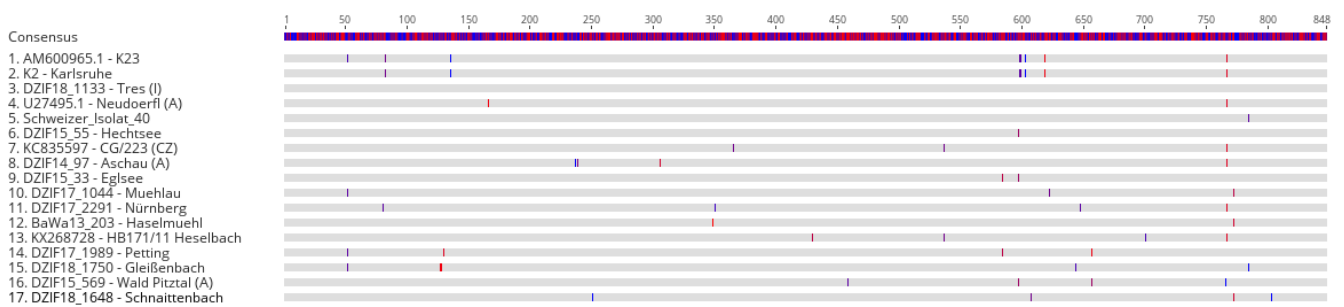

**Figure S1.** Differences in the E-genes and NS1-Proteins on amino acid level. Substitutions are highlighted in color according to their biochemical characteristics.
