# Supplementary material for: Increased Vaccination Diversity Leads to Higher and Less-Variable Neutralization of TBE Viruses of the European Subtype
Source: Vaccines (Basel). 2023 May 31;11(6):1044. doi: 10.3390/vaccines11061044 (PMC10304915; doi:10.3390/vaccines11061044)
Supplement: Supplementary file 1 [file vaccines-11-01044-s001.zip › vaccines-2412326-Table S2.xlsx]

## Sheet: Sheet1
Sera	Vaccination	Count	Age	Sex	YF Vaccination
HuSe002	FSME-IMMUN®	5	30–40	Male	Vaccinated
HuSe013	FSME-IMMUN®	3	20–30	Male	No vaccination
HuSe017	FSME-IMMUN®	3	40–60	Female	No vaccination
HuSe021	FSME-IMMUN®	3	20–30	Female	No vaccination
HuSe022	FSME-IMMUN®	4	40–60	Female	Vaccinated
HuSe026	FSME-IMMUN®	5	30–40	Male	Vaccinated
HuSe027	FSME-IMMUN®	6	30–40	Female	No vaccination
HuSe028	FSME-IMMUN®	6	30–40	Female	No vaccination
HuSe029	FSME-IMMUN®	5	20–30	Male	Vaccinated
HuSe035	FSME-IMMUN®	3	20–30	Female	No vaccination
HuSe034	FSME-IMMUN®	6	40–60	Female	Vaccinated
HuSe003	MIX	5	40–60	Male	Vaccinated
HuSe007	MIX	5	30–40	Female	Vaccinated
HuSe009	MIX	6	30–40	Female	Vaccinated
HuSe012	MIX	5	30–40	Female	No vaccination
HuSe015	MIX	5	20–30	Male	No vaccination
HuSe024	MIX	5	20–30	Female	No vaccination
HuSe025	MIX	5	40–60	Female	No vaccination
HuSe030	MIX	7	30–40	Male	No vaccination
HuSe031	MIX	3	30–40	Female	Vaccinated
HuSe038	MIX	4	20–30	Male	No vaccination
B1	Encepur®	4	20–30	Female	No vaccination
B5	Encepur®	3	20–30	Female	No vaccination
B8	Encepur®	5	20–30	Male	No vaccination
B9	Encepur®	4	20–30	Female	No vaccination
B11	Encepur®	5	20–30	Female	No vaccination
B12	Encepur®	4	20–30	Female	No vaccination
B13	Encepur®	6	20–30	Female	No vaccination
B14	Encepur®	4	20–30	Male	No vaccination
B18	Encepur®	6	20–30	Female	No vaccination
B20	Encepur®	4	20–30	Male	No vaccination
B23	Encepur®	4	20–30	Female	No vaccination
B24	Encepur®	5	40–60	Female	No vaccination
