# Supplementary material for: Increased Vaccination Diversity Leads to Higher and Less-Variable Neutralization of TBE Viruses of the European Subtype
Source: Vaccines (Basel). 2023 May 31;11(6):1044. doi: 10.3390/vaccines11061044 (PMC10304915; doi:10.3390/vaccines11061044)
Supplement: Supplementary file 1 [file vaccines-11-01044-s001.zip › vaccines-2412326-Table S3.xlsx]

## Sheet: Sheet1
Strain ID	Acc.	Country	Region/City	Year of Isolation	Isolation Source	Passage History	Reference	Sequencing Method
K2 (Karlsruhe); K23	AM600965	Germany	Karlsruhe	1975	Ixodes ricinus	4. BMB	[21]	Amplicon sequencing with Illumina TruSeq
						1. A549	provided by FX Heinz, Vienna, Austria
Neudörfl	TEU27495	Austria	Neudoerfl	1971	Ixodes ricinus	Unknown	[22,23]	Amplicon sequencing with Illumina TruSeq
DZIF14 97		Austria	Aschau/Zillertal	2014	Ixodes ricinus	A549 Passage 01	Isolate of IMB	Amplicon sequencing with Illumina TruSeq
DZIF15 33		Germany/Austria	Eglsee/Kufstein	2015	Ixodes ricinus	A549 Passage 01	Isolate of IMB	Amplicon sequencing with Illumina TruSeq
DZIF15 569		Austria	Wald/Pitztal	2015	Ixodes ricinus	A549 Passage 01	Isolate of IMB	Amplicon sequencing with Illumina TruSeq
DZIF17 1044		Germany	Mühlau	2017	Ixodes ricinus	A549 Passage 01	Isolate of IMB	Amplicon sequencing with Illumina TruSeq
DZIF17 1989		Germany	Petting	2017	Ixodes ricinus	A549 Passage 01	Isolate of IMB	Amplicon sequencing with Illumina TruSeq
DZIF18 1133		Italy	Tres	2018	Ixodes ricinus	A549 Passage 01	Isolate of IMB	Amplicon sequencing with Illumina TruSeq
BaWa11 171	KX268728	Germany	Heselbach	2011	Ixodes ricinus	A549 Passage 01	[32]	Sanger sequencing
Schweizer_Isolat (40)		Switzerland	Schaffhausen	1972	Ixodes ricinus	1. BMB	provided by Franz X. Heinz	Amplicon sequencing with Illumina TruSeq
						1. A549
BaWa13 203		Germany	Haselmühl	2013	Ixodes ricinus	A549 Passage 01	Isolate of IMB	Amplicon sequencing with Illumina TruSeq
DZIF17 2291		Germany	Nürnberg	2017	Ixodes ricinus	A549 Passage 01	Isolate of IMB	Amplicon sequencing with Illumina TruSeq
DZIF18 1750		Germany	Gleissenbach	2018	Ixodes ricinus	A549 Passage 01	Isolate of IMB	Amplicon sequencing with Illumina TruSeq
DZIF18 1648		Germany	Schnaittenbach	2018	Ixodes ricinus	A549 Passage 01	Isolate of IMB	Amplicon sequencing with Illumina TruSeq
CG/223_1990	KC835597	Slovakia	Zahorska Ves	1990	Myodes glareolus	5. BMB	[33]	Sanger sequencing
						3. Vero
						1. A549
DZIF15 55		Germany/Austria	Hechtsee	2015	Ixodes ricinus	A549 Passage 01	Isolate of IMB	Amplicon sequencing with Illumina TruSeq
